# Supplementary material for: Carbon Use Efficiency and Its Temperature Sensitivity Covary in Soil Bacteria
Source: PubMed Central journal article supplement (PMC6974560; doi:10.1128/mbio.02293-19), 2020-01-21
Supplement: mBio.02293-19-sf002.pdf [file mBio.02293-19-sf002.pdf]

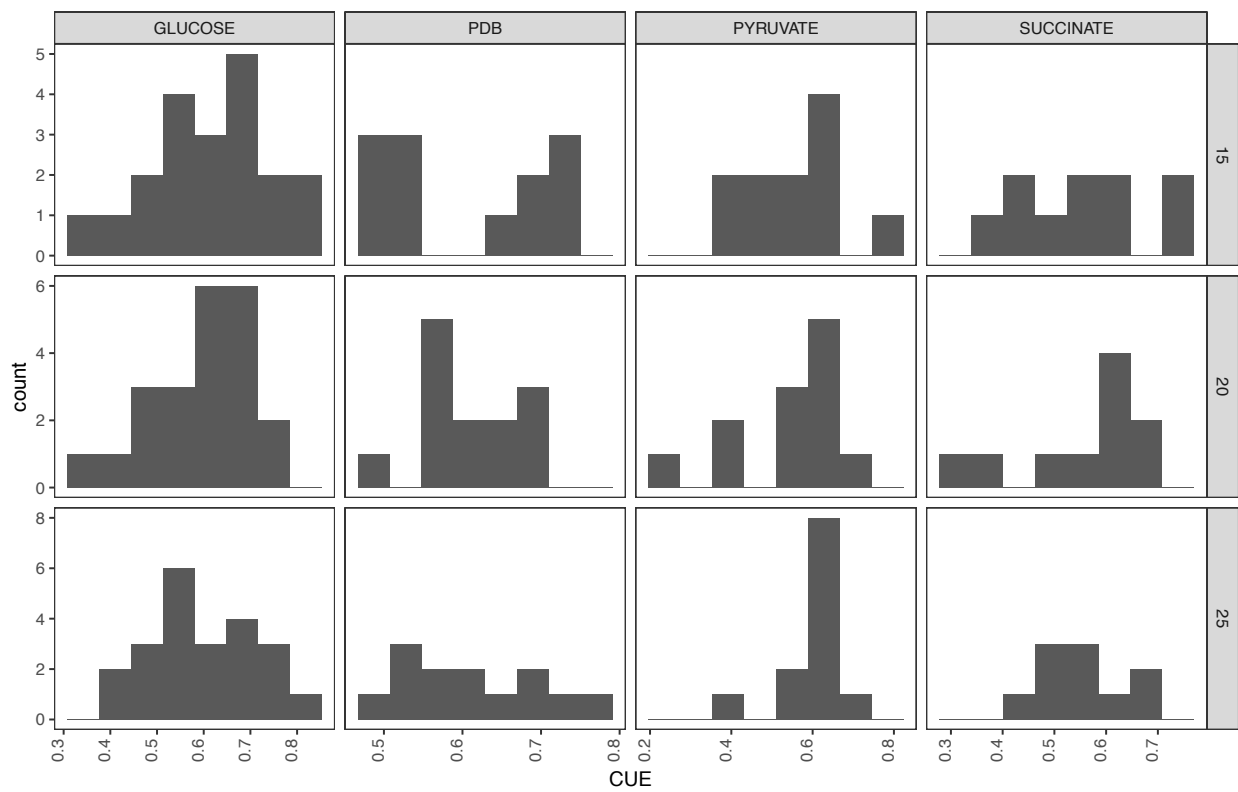

Figure S2: Frequency histograms of CUE of isolates grown on the four substrates at three temperatures. Each count is the average of all replicates for a given isolate under that assay condition.
