# Supplementary material for: Carbon Use Efficiency and Its Temperature Sensitivity Covary in Soil Bacteria
Source: PubMed Central journal article supplement (PMC6974560; doi:10.1128/mbio.02293-19), 2020-01-21
Supplement: mBio.02293-19-sf004.pdf [file mBio.02293-19-sf004.pdf]

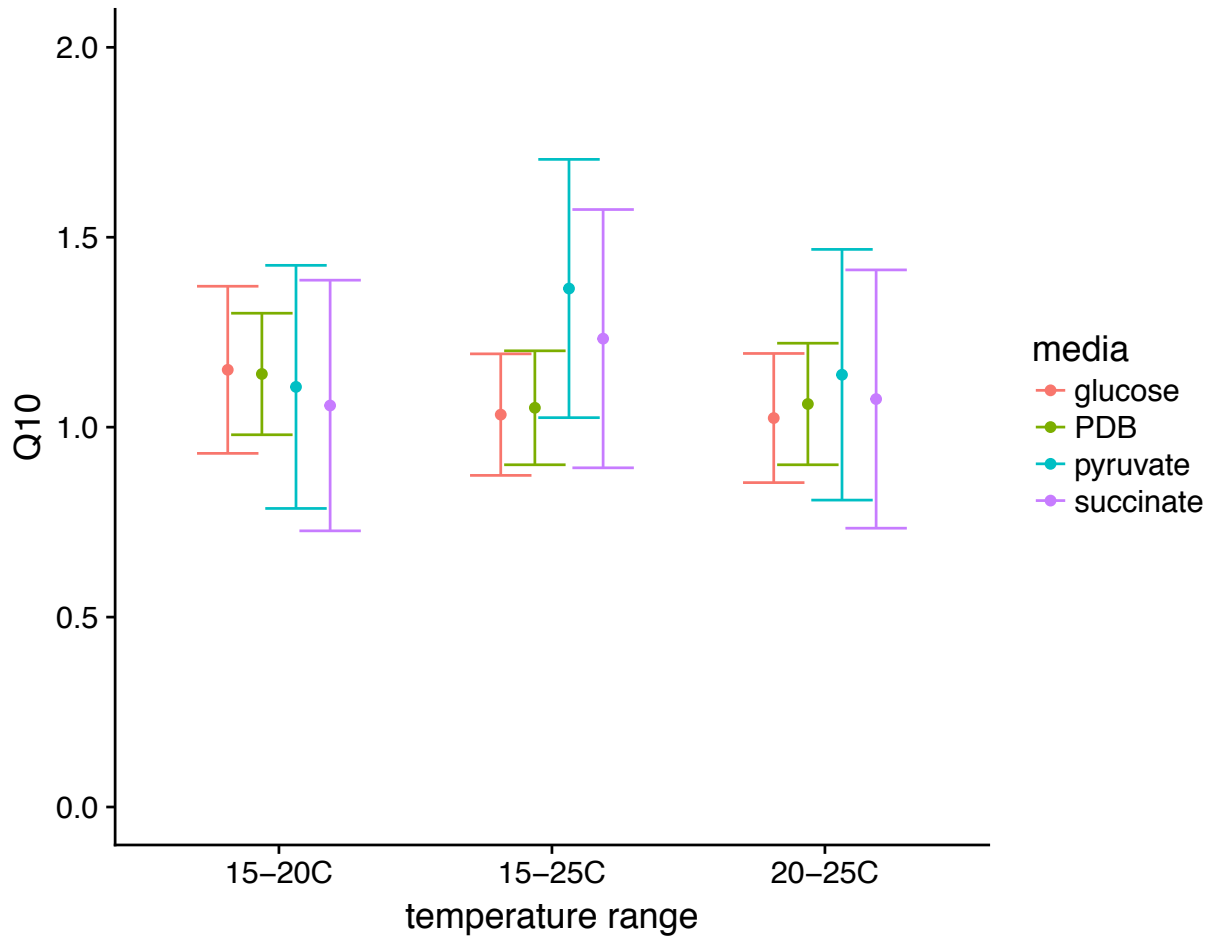

Figure S4: Phylogenetically-weighted mean temperature sensitivity of CUE for the four substrates and three temperature ranges used in this study, reported with 95% confidence intervals. Reported means and confidence intervals are the posterior estimates resulting from running an animal model in MCMCglmm.
