# Supplementary material for: Carbon Use Efficiency and Its Temperature Sensitivity Covary in Soil Bacteria
Source: PubMed Central journal article supplement (PMC6974560; doi:10.1128/mbio.02293-19), 2020-01-21
Supplement: mBio.02293-19-sf007.pdf [file mBio.02293-19-sf007.pdf]

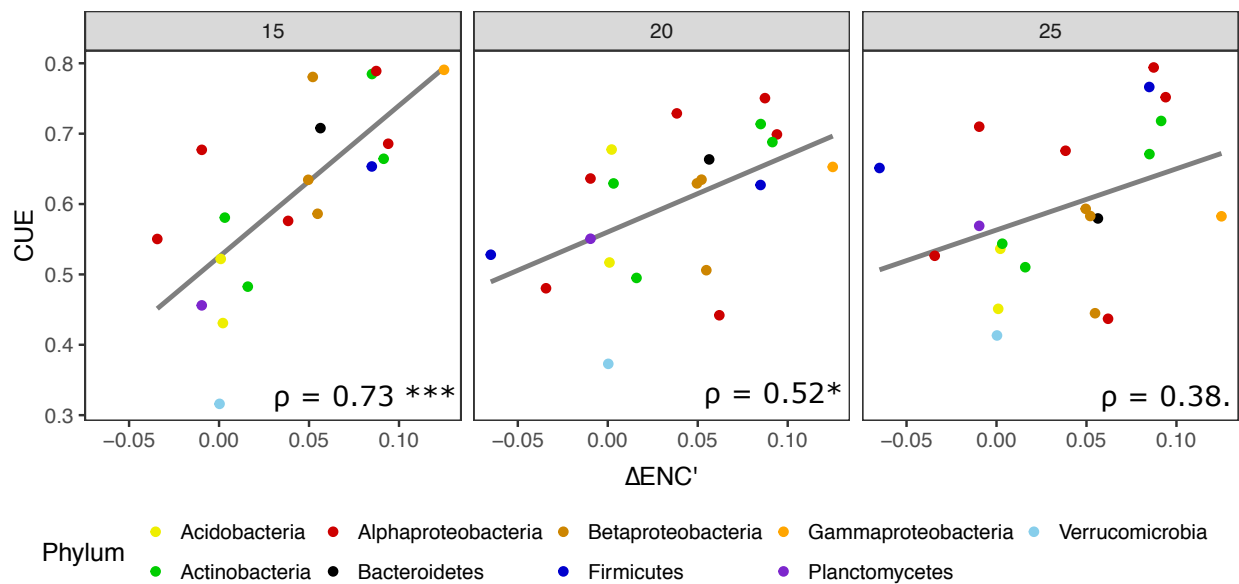

Figure S7: Correlations between CUE and codon bias (as per (41)) for bacterial isolates grown on glucose. Spearman correlation coefficients (not corrected for phylogenetic correlation) are included, along with the p-value (\*\*\*)  $P < 0.001$ ; \*  $P < 0.05$ ; .  $P < 0.1$
