# Supplementary material for: Carbon Use Efficiency and Its Temperature Sensitivity Covary in Soil Bacteria
Source: PubMed Central journal article supplement (PMC6974560; doi:10.1128/mbio.02293-19), 2020-01-21
Supplement: mBio.02293-19-st002.pdf [file mBio.02293-19-st002.pdf]

Table S2: Genomic markers of CUE or CUE temperature sensitivity ( $Q_{10}$ ) identified in exploratory and complete glucose datasets and confirmed by their presence as correlates of efficiency in the microcosms dataset or for at least two of the three remaining substrates in the liquid culture assays. Markers are included when the slopes were either both positive or both negative for the two datasets at an alpha of 0.05.

| validation method | Temperature/<br>temperature range (°C) | corelation | KO                                                                                                                                                                                                                           |                                                                                                                                                                                                                                                                                                                |                                                                                                                                                                                                                                                                                                                                              |                                                                                                                                                                                                                                   |
|-------------------|----------------------------------------|------------|------------------------------------------------------------------------------------------------------------------------------------------------------------------------------------------------------------------------------|----------------------------------------------------------------------------------------------------------------------------------------------------------------------------------------------------------------------------------------------------------------------------------------------------------------|----------------------------------------------------------------------------------------------------------------------------------------------------------------------------------------------------------------------------------------------------------------------------------------------------------------------------------------------|-----------------------------------------------------------------------------------------------------------------------------------------------------------------------------------------------------------------------------------|
| microcosms        | 15                                     | negative   | K09474 - acid phosphatase (class A)<br>K01625 - 2-dehydro-3-deoxyphosphogluconate aldolase / (4S)-4-hydroxy-2-oxoglutarate aldolase                                                                                          |                                                                                                                                                                                                                                                                                                                |                                                                                                                                                                                                                                                                                                                                              |                                                                                                                                                                                                                                   |
|                   | 25                                     | negative   | K00809 - deoxyhypusine synthase                                                                                                                                                                                              |                                                                                                                                                                                                                                                                                                                |                                                                                                                                                                                                                                                                                                                                              |                                                                                                                                                                                                                                   |
|                   |                                        | positive   | K02167 - TetR/AcrR family transcriptional regulator, transcriptional repressor of bet genes<br>K09815 - zinc transport system substrate-binding protein                                                                      |                                                                                                                                                                                                                                                                                                                |                                                                                                                                                                                                                                                                                                                                              |                                                                                                                                                                                                                                   |
| other substrates  | 15                                     | negative   | K01733 - threonine synthase<br>K07095 - uncharacterized protein<br>K14441 - ribosomal protein S12 methylthiotransferase<br>K01752 - L-serine dehydratase<br>K02016 - iron complex transport system substrate-binding protein |                                                                                                                                                                                                                                                                                                                |                                                                                                                                                                                                                                                                                                                                              |                                                                                                                                                                                                                                   |
|                   |                                        |            | positive                                                                                                                                                                                                                     | K02072 - D-methionine transport system permease protein<br>K03786 - 3-dehydroquinone dehydratase II<br>K03825 - putative acetyltransferase<br>K05596 - LysR family transcriptional regulator, chromosome initiation inhibitor<br>K09780 - Uncharacterized protein<br>K12256 - putrescine—pyruvate transaminase |                                                                                                                                                                                                                                                                                                                                              |                                                                                                                                                                                                                                   |
|                   |                                        |            |                                                                                                                                                                                                                              | 20                                                                                                                                                                                                                                                                                                             | negative                                                                                                                                                                                                                                                                                                                                     | K14441 - ribosomal protein S12 methylthiotransferase                                                                                                                                                                              |
|                   |                                        |            |                                                                                                                                                                                                                              | 25                                                                                                                                                                                                                                                                                                             | positive                                                                                                                                                                                                                                                                                                                                     | K03442 - small conductance mechanosensitive channel<br>K00864 - glycerol kinase                                                                                                                                                   |
|                   |                                        |            |                                                                                                                                                                                                                              |                                                                                                                                                                                                                                                                                                                | positive                                                                                                                                                                                                                                                                                                                                     | K02013 - iron complex transport system ATP-binding protein<br>K02015 - iron complex transport system permease protein<br>K02342 - DNA polymerase III subunit epsilon<br>K05846 - osmoprotectant transport system permease protein |
|                   | microcosms                             | 15-20      |                                                                                                                                                                                                                              | negative                                                                                                                                                                                                                                                                                                       | K01638 - malate synthase [EC:2.3.3.9]<br>K07222 - putative flavoprotein involved in K <sup>+</sup> transport<br>K02536 - UDP-3-O-[3-hydroxymyristoyl] glucosamine N-acyltransferase [EC:2.3.1.191]<br>K03560 - biopolymer transport protein TolR<br>K06168 - tRNA-2-methylthio-N <sup>6</sup> -dimethylallyl-adenosine synthase [EC:2.8.4.3] |                                                                                                                                                                                                                                   |
|                   |                                        |            | positive                                                                                                                                                                                                                     |                                                                                                                                                                                                                                                                                                                | K07023 - putative hydrolases of HD superfamily<br>K08191 - MFS transporter, ACS family, hexuronate transporter<br>K09747 - uncharacterized protein<br>K11085 - ATP-binding cassette, subfamily B, bacterial MsbA [EC:3.6.3.-]                                                                                                                |                                                                                                                                                                                                                                   |
|                   |                                        |            |                                                                                                                                                                                                                              |                                                                                                                                                                                                                                                                                                                | 15-25                                                                                                                                                                                                                                                                                                                                        | negative                                                                                                                                                                                                                          |
|                   |                                        | 20-25      | negative                                                                                                                                                                                                                     | K01858 - myo-inositol-1-phosphate synthase [EC:5.5.1.4]<br>K09764 - uncharacterized protein                                                                                                                                                                                                                    |                                                                                                                                                                                                                                                                                                                                              |                                                                                                                                                                                                                                   |
|                   |                                        |            |                                                                                                                                                                                                                              | positive                                                                                                                                                                                                                                                                                                       | K02049 - NitT/TauT family transport system ATP-binding protein<br>K07240 - chromate transporter                                                                                                                                                                                                                                              |                                                                                                                                                                                                                                   |
| other substrates  |                                        | 15-20      | positive                                                                                                                                                                                                                     | K08151 - MFS transporter, DHA1 family, tetracycline resistance protein                                                                                                                                                                                                                                         |                                                                                                                                                                                                                                                                                                                                              |                                                                                                                                                                                                                                   |
|                   |                                        | 20-25      |                                                                                                                                                                                                                              | K03417 - methylisocitrate lyase [EC:4.1.3.30]<br>K19294 - alginate O-acetyltransferase complex protein AlgI                                                                                                                                                                                                    |                                                                                                                                                                                                                                                                                                                                              |                                                                                                                                                                                                                                   |
